1 **Dengue in western Uganda: A prospective cohort of children presenting with**  
2 **undifferentiated febrile illness**

3

4

5 Ross M. Boyce<sup>1,2\*</sup>, Matthew Collins<sup>3</sup>, Rabbison Muhindo<sup>2</sup>, Regina Nakakande<sup>2</sup>, Emily J.  
6 Ciccone<sup>1</sup>, Samantha Grounds<sup>1</sup>, Daniel Espinoza<sup>3</sup>, Yerun Zhu<sup>3</sup>, Michael Matte<sup>2</sup>, Moses  
7 Ntaroo<sup>2</sup>, Dan Nyehangane<sup>2,5</sup>, Jonathan J. Juliano<sup>1</sup>, and Edgar M. Mulogo<sup>2</sup>

8 <sup>1</sup>Division of Infectious Diseases, University of North Carolina at Chapel Hill, Chapel Hill,  
9 North Carolina, 27599, USA

10

11 <sup>2</sup>Department of Community Health, Faculty of Medicine, Mbarara University of Science &  
12 Technology, Mbarara, Uganda

13

14 <sup>3</sup>Division of Infectious Diseases, Emory University, Atlanta, Georgia, 30322, USA

15

16 <sup>4</sup>College of Arts and Sciences, University of North Carolina at Chapel Hill, Chapel Hill,  
17 North Carolina, 27599, USA

18

19 <sup>5</sup>Epicentre Mbarara Research Centre, Mbarara, Uganda

20

21 \*Corresponding author:

22

23 Ross M. Boyce MD, MSc  
24 Division of Infectious Diseases  
25 University of North Carolina at Chapel Hill  
26 130 Mason Farm Road  
27 Chapel Hill, NC USA 27599  
28 Phone: 919.966.2537  
29 [roboyce@med.unc.edu](mailto:roboyce@med.unc.edu)

30

31 **Keywords:** Dengue, fever, arbovirus, epidemiology, Uganda

32

33 **Running Title:** Dengue in Western Uganda

34

35 **Word Count:** Abstract – 197 | Text – 3,087

36 **ABSTRACT**

37 **Background:** The spatial distribution and burden of dengue in sub-Saharan Africa  
38 remains highly uncertain, despite high levels of ecological suitability. The goal of this  
39 study was to describe the epidemiology of dengue among a cohort of febrile children  
40 presenting to outpatient facilities located in areas of western Uganda with differing levels  
41 of urbanicity and malaria transmission intensity.

42

43 **Methods:** Eligible children were first screened for malaria using rapid diagnostic tests.  
44 Children with a negative malaria result were tested for dengue using a combination  
45 NS1/IgM/IgG rapid test (SD Bioline Dengue Duo). Confirmatory testing by RT-PCR was  
46 performed in a subset of participants. Antigen-capture ELISA was performed to estimate  
47 seroprevalence.

48

49 **Results:** Only 6 of 1,416 (0.42%) children had a positive dengue rapid test, while none  
50 of the RT-PCR results were positive. ELISA testing demonstrated reactive IgG  
51 antibodies in 28 (2.2%) participants with the highest prevalence seen at the urban site in  
52 Mbarara (19 of 392, 4.9%,  $p < 0.001$ ).

53

54 **Conclusions:** Overall, these findings suggest that dengue, while present, is an  
55 uncommon cause of non-malarial, pediatric febrile illness in western Uganda. Further  
56 investigation into the ecological factors that sustain low-level transmission in urban  
57 settings are urgently needed to reduce the risk of epidemics.

## 58 **Background**

59 Dengue is a mosquito-borne viral disease that is estimated to cause upwards of 400  
60 million infections each year [1, 2]. While more than half of the world's population is  
61 thought to be at risk, the global distribution and burden of dengue remains highly  
62 uncertain [3]. Nowhere is this epidemiological uncertainty more pronounced than in  
63 Africa, where the requisite laboratory infrastructure to distinguish dengue from other  
64 causes of febrile illness is not routinely available [4]. Despite limited data, there is  
65 reasonable consensus for the existence of endemic dengue transmission in many  
66 countries, with modeling frameworks suggesting that Africa's disease burden may be  
67 similar to that of other high transmission areas, such as the Americas [1].

68

69 The indirect evidence supporting endemic dengue transmission in Uganda is relatively  
70 strong. There are favorable precipitation and temperature conditions, the *Aedes aegypti*  
71 mosquito - the primary vector of dengue, along with yellow fever and Rift Valley fever -  
72 is ubiquitous in Uganda. Dengue outbreaks and transmission have been documented in  
73 neighboring countries, and cases have been reported among travelers returning from  
74 Uganda [1, 5, 6]. Other factors favoring the likelihood of dengue transmission in Uganda  
75 include an increasingly globalized economy and rapid urbanization [7, 8].

76

77 While the majority of dengue infections result in either asymptomatic or mild, self-limited  
78 clinical disease, the potential health system and economic impact of dengue  
79 transmission in a malaria-endemic country like Uganda is significant but also not well  
80 understood. Given the non-specific symptoms and lack of available diagnostic tools,  
81 dengue infections may frequently be misdiagnosed and empirically treated as malaria  
82 [6]. This likely contributes to (i) over-estimation of malaria transmission, (ii) over-use of  
83 artemisinin combination therapies (ACT), perhaps accelerating to the development of

84 resistance, and (iii) inadequate resourcing of dengue surveillance and control measures,  
85 which generally do not overlap with malaria control strategies such as insecticide-treated  
86 nets (ITN) [9].

87

88 Defining the burden of dengue in countries like Uganda is critically important, especially  
89 as new tools such as vaccines become more widely available [10, 11]. Therefore, the  
90 overarching aim of this study was to describe the epidemiology of dengue among a  
91 cohort of children presenting to outpatient public health facilities in western Uganda with  
92 acute febrile illness.

93

## 94 **Methods**

### 95 *Study Setting*

96 The study was conducted at two sites in the Kasese District and one site in the Mbarara  
97 District of Southwest Uganda (**Figure 1**). These facilities were purposefully selected to  
98 examine dengue as a potential cause of non-malarial febrile illness across different  
99 ecological settings and in areas of varying malaria transmission intensity (**Table 1**).  
100 There are no government-provided diagnostic tools or standardized treatment protocols  
101 for dengue fever at public health facilities in Uganda [12].

102

### 103 *Study Design*

104 The study was a prospective, observational cohort design, enrolling malaria-negative,  
105 febrile children from November 2017 to June 2018. Children (age <18 years) presenting  
106 to one of three outpatient clinics with documented fever (axillary temperature  $\geq 38.0$   
107 celsius [C]) or a reported history of fever within the last 7 days were eligible for inclusion.  
108 Children presenting without a parent or guardian to provide consent were excluded. After  
109 consent was provided, study personnel recorded demographic information, vital signs,

110 and administered a brief health questionnaire.

111

112 Laboratory staff performed a malaria rapid diagnostic test (mRDT) (SD Bioline Malaria  
113 Ag P.f, Standard Diagnostics, Republic of Korea) and collected dried blood spots (DBS)  
114 on filter paper (Whatman, Chicago, IL). DBS sampling was chosen as a pragmatic but  
115 effective option for sampling children across the different field conditions at our study  
116 sites [13]. The reliability of measuring antibodies eluted from DBS has been validated  
117 several times, [14, 15] and we and others have used DBS-based serology to study the  
118 epidemiology of arboviruses in both standard ELISA as well as multiplex platforms [16-  
119 18]. Children with a positive mRDT result were excluded from further participation.

120 Children with a negative mRDT result subsequently underwent testing with a dengue  
121 rapid diagnostic test (dRDT) (SD Bioline Dengue Duo, Standard Diagnostics Korea).  
122 Participants at the Mbarara Regional Referral Hospital outpatient clinic, where a reliable  
123 cold chain was available, had 5 mL of venous rather than capillary blood drawn into  
124 serum separator tubes for further testing in addition to the dRDT.

125

126 Results of the dRDT were provided to the responsible clinician for the purposes of  
127 counseling and case management. Treatment and disposition (i.e. admission versus  
128 discharge) plans, as determined by the clinician, were recorded. DBS were stored at  
129 room temperature under desiccation and serum samples were stored at -20 °C until  
130 analysis.

131

### 132 *Laboratory Methods*

133 All RDTs for the study were obtained directly from the manufacturer, stored in the  
134 original packaging at room temperature, and used in accordance with the manufacturer's  
135 instructions prior to the expiration date. Further description of specific procedures is

136 provided below.

137

### 138 *Elution of dried blood spots for serologic analysis*

139 Plasma proteins were eluted from DBS as previously described [16-18]. One 6-mm hole  
140 punch of each DBS was placed in a 1.5 mL Eppendorf tube with 300  $\mu$ L of phosphate-  
141 buffered saline, and rotated for 2 hour at 37°C. This yielded an eluate that is equivalent  
142 to a 1:40 plasma dilution. Eppendorf tubes were centrifuged then eluate transferred to a  
143 new tube. Eluate was heat inactivated for 30 minutes in a 56°C water bath. The samples  
144 were centrifuged again to pellet proteinaceous debris and the supernatant was  
145 transferred to a new tube and stored at 4°C for up to 1 week or at -20°C until use.

146

### 147 *Antigen capture IgG ELISA*

148 Binding IgG to DENV or ZIKV was measured by antigen capture ELISA as previously  
149 described [19]. Briefly, DENV antigen (an equal volume mixture of supernatant from  
150 each of the four DENV serotypes cultured in C6/36 cells) was captured by the anti-E  
151 protein mouse mAb 4G2 [20]. Plates were blocked with 3% nonfat dry milk, and  
152 incubated with DBS eluate at 37°C for 1 hour, and binding was detected with an alkaline  
153 phosphatase-conjugated goat anti-human IgG secondary Ab and *p*-nitrophenyl  
154 phosphate substrate. Absorbance at 405 nm (optical density, OD) was measured by  
155 spectrophotometry on a plate reader. ELISA data are reported as OD values that are the  
156 average of technical replicates. The average OD for technical replicates using DBS  
157 eluate obtained from flavivirus-naïve individuals (NHS) served as the negative control in  
158 ELISA assays. The cut off for positivity was calculated for each plate as the average OD  
159 of NHS = standard deviations + 0.1 [16-18].

160

### 161 *IgM ELISA*

162 Testing for anti-DENV IgM was only performed on participant samples with either a  
163 positive dRDT or IgG ELISA per CDC MAC ELISA protocol after titrating individual  
164 reagents per instructions [21]. DBS eluate was tested at 1:40 dilution. DENV1-4 antigen  
165 was the same as for IgG ELISA above. Plates were washed 3 times between each step.  
166 The Enhanced K-Blue TMB substrate reaction was stopped after 30 minutes by addition  
167 of 50  $\mu$ L 1N HCl. Optical density (OD) of each well was determined within 5 minutes at  
168 450nm.

169

#### 170 *Neutralization Assays*

171 Neutralization titers were determined by 96-well microFRNT [22, 23]. Due to limited  
172 sample availability from DBS, an abbreviated neutralization assay format was used  
173 (eFRNT). DBS eluates were run in singleton over four 4-fold dilutions. Serial dilutions of  
174 DBS eluate were mixed with approximately 75-100 focus-forming units of virus in DMEM  
175 with 2% FBS. The virus-antibody mixtures were incubated for 1 hour at 37°C and then  
176 transferred to a monolayer of Vero cells for infection for 2 hours at 37°C. OptiMEM  
177 overlay media supplemented with 2% FBS and 5g (1%) Carboxymethylcellulose was  
178 then added, and cultures were incubated for 48 hours (DENV2 and DENV4) or 52 hours  
179 (DENV1, DENV3). Cells were fixed with 100  $\mu$ L of 1:1 methanol:acetone for 30 minutes.  
180 100  $\mu$ L of permeabilization buffer was added for 10 minutes followed by 100  $\mu$ L of  
181 blocking buffer (3% normal goat plasma in permeabilization buffer) and left overnight at  
182 4°C. 50  $\mu$ L of 4G2 at 12.5 ng/ $\mu$ L were added to the plates and incubated for 1 hour at  
183 37°C. Cells were washed with a microplate washer followed by the addition of 50  $\mu$ L of  
184 1:3000 horseradish peroxidase-conjugated goat anti-mouse secondary antibody for 1  
185 hour at 37°C. Foci were visualized with 100  $\mu$ L of True Blue and counted with a user-  
186 supervised automated counting program on 2x-magnified images of micro-wells

187 obtained on a CTL ELISPOT reader. NHS controls were included on every plate to  
188 define 100% infection. The eFRNT value is a discrete number corresponding to the  
189 dilution factor at which 50% maximum FFU are observed or the average of the two  
190 dilution factors between which 50% FFU is crossed.

191

### 192 *Real-time Polymerase Chain Reaction*

193 Whole blood was drawn into serum separator tubes and centrifuged. Viral RNA was  
194 extracted from 140  $\mu$ L of serum using the QIAamp extraction kit (QIAGEN Hilden,  
195 Germany) and eluted in 60  $\mu$ L. Real time PCR was performed on the Rotor-Gene Q  
196 (QIAGEN Hilden, Germany) platform using the RealStar <sup>®</sup> kits for Dengue, V2.0,  
197 Chikungunya, V2.0 and Zika V.1.0 (Altona Diganostics, Hamburg, Germany) in  
198 accordance with manufacturer's instructions.

199

### 200 *Statistical analysis*

201 Data was collected in a REDCap database and analyzed with Stata 15.1 (College  
202 Station, TX) [24]. We summarized participant characteristics and compared them  
203 between those with positive and negative mRDT results using Student's t-test (normally  
204 distributed data) or Wilcoxon rank-sum test (nonparametric data) for continuous  
205 variables and Pearson  $\chi^2$  test for categorical variables. In a post-hoc analysis, we  
206 performed multivariable regression analyses to explore the demographic, geographic,  
207 and clinical parameters associated with the primary outcome of interest: a positive  
208 dengue IgG. All variables that were significant in univariate models with a pre-specified  
209  $p$ -value of  $<0.25$  were included in the subsequent multivariate analysis [25]. A resulting  
210  $p$ -value of  $<0.05$  was considered statistically significant in the final models.

211

## 212 **Results**



213 A total of 1,702 children met the eligibility criteria and were screened for malaria with a  
214 mRDT. Complete laboratory results were available for 1,693 (99.5%) participants, who  
215 were subsequently included in the analysis. Characteristics of the cohort are  
216 summarized in **Table 2**. The median age was 5 years (IQR 2 – 10), although children at  
217 Bugoye were significantly older (10 years, IQR 5 – 14,  $p < 0.0001$ ), likely attributable to an  
218 existing village-based, community health worker led fever management intervention  
219 targeting children less than five years of age and reducing the number of these patients  
220 that presented to our study site [26].

221

222 Overall, 369 children (21.8%) had a positive mRDT result. The lowest rate was observed  
223 at MRRH (17 of 455, 3.7%, 95% CI 2.3 – 5.9), whereas much higher rates were seen in  
224 Kasese (138 of 606, 22.8%, 95% CI 19.6 – 26.3) and Bugoye (214 of 632, 33.9%, 95%  
225 CI 30.3 – 37.7). Self-reported ITN use was associated with a protective effect against  
226 malaria (IRR 0.70, 95% CI 0.54 – 0.90,  $p = 0.006$ ), but when excluding the low-  
227 transmission site, the effect was no longer significant (IRR 0.85, 95% CI 0.65 – 1.11,  
228  $p = 0.25$ ).

229

230 There was overlap in self-reported symptoms between children with positive and  
231 negative mRDT results (**Table 2**). Among all participants, cough (69.1%), headache  
232 (63.6%), and rhinorrhea (53.0%) were the most frequently reported symptoms. A total of  
233 431 (25.4%) participants reported all three of these symptoms, 364 (84.5%) of whom  
234 had a negative mRDT result. Participants with a negative mRDT were also more likely to  
235 have sought care and received treatment for malaria within the past 14 days. In contrast,  
236 arthralgia and myalgia were more frequently reported in the mRDT positive group.

237

238 Of the 1,324 participants with a negative mRDT test result, 1,285 (97.1%) had an  
239 evaluable dRDT result, of which 5 (0.39%) had a positive result, defined as a visible  
240 NS1, IgM, or IgG band. Individual tests results include one child with positive IgM bands,  
241 three with positive IgG bands, and one with positive IgM and IgG bands. There were  
242 three positive dRDT results in Bugoye, two in Mbarara, and and one in Kasese (**Figure**  
243 **2**) All samples from MRRH tested by RT-PCR were negative for DENV, CHIKV, and  
244 ZIKV.

245

246 Serological testing of 1,247 DBS samples from participants with a negative mRDT test  
247 result identified reactive IgG antibodies in 28 (2.3%) participants. There was a significant  
248 difference in seroprevalence between Mbarara (19 of 392, 4.9%), which is a more urban  
249 center, and the rural sites (Kasese 2 of 453, 0.4%; Bugoye 7 of 414, 1.7%;  $p < 0.001$ ).

250 The Mbarara study site was the only significant predictor of a dengue infection in the  
251 multivariable analysis when using Kasese as the reference, although there was a  
252 statistical trend towards males being at higher risk of infection ( $p = 0.10$ ) (**Table 3**).

253 Samples that were positive by RDT or IgG ELISA were also tested by eFRNT and DENV  
254 IgM-ELISA, but none were positive for IgM antibodies.

255

256 Of the 28 participants with a reactive IgG antibodies by ELISA, only 1 (3.6%) had a  
257 positive IgG band on the dRDT. This occurred in the one patient with both IgM and IgG  
258 bands positive on the dRDT. Overall, the correlation in IgG results between the dRDT  
259 and ELISA was poor ( $\kappa = 0.06$ , 95% CI 0 – 0.40).

260

261 Among those with a negative mRDT result, 1,297 of 1,324 (98.0%) received treatment  
262 with an antibiotic, including five who also received treatment with  
263 artemether/lumefantrine (AL). An additional 17 (1.3%) received treatment with AL (and

264 no antibiotic) despite negative mRDT test results. The vast majority of children (1,279 of  
265 1,316, 97.2%) were discharged from the outpatient clinics, while 35 (2.7%) were  
266 admitted. There were no significant differences in admission rates by sex, age category,  
267 or clinical site.

268

## 269 **Discussion**

270 Despite favorable climate and ecology, our findings suggest that dengue is an  
271 uncommon cause of non-malarial, pediatric febrile illness in western Uganda. Our results  
272 are consistent with those obtained from a laboratory-based surveillance system of  
273 inpatient pediatric admissions across six sentinel sites in Uganda, which reported recent  
274 arboviral infection in only 18 of 622 (2.9%) samples tested [27], as well as multi-site  
275 seroprevalence study of healthy adult blood donors, which identified dengue antibodies  
276 in 72 of 1,744 (4.1%) of donors [28]. However, these data exclude neither the possibility  
277 of sporadic dengue outbreaks in the past or future nor the possibility that dengue or  
278 other *Aedes*-borne viruses could establish endemicity in this region given the favorable  
279 ecological conditions. Our time-limited and geographically-restricted study design,  
280 however, does provide a robust snapshot of current arbovirus transmission. While  
281 seroprevalence studies that include older subjects may increase the sensitivity for  
282 detecting historic dengue transmission, our findings do provide strong evidence for the  
283 presence of low-level transmission, particularly at the more urban site in Mbarara. In  
284 areas of higher transmission, dengue seroprevalence is typically 20% or greater in  
285 young children [29-31]. The few cases detected here, along with the large susceptible  
286 population make dengue introduction a major concern, and surveillance together with  
287 further investigation of the demographic, spatial, and entomologic factors that could  
288 support epidemic and endemic dengue infection in urban East Africa should be a high  
289 priority.

290

291 Given the low number of positive cases, a rigorous assessment of the performance of  
292 the dengue rapid diagnostic tests was not possible. The relatively poor correlation in IgG  
293 results between the dRDT and the ELISA is consistent with a study of febrile outpatients  
294 conducted in the Democratic Republic of Congo, which showed 2.5% IgG positivity by  
295 dRDT and 34.0% positivity by ELISA with an estimated sensitivity of 7.6% [32]. It is  
296 crucial to note that dRDT are designed for use in the setting of acute infection and not  
297 for seroprevalence studies. The main advantage of including IgG testing in this context is  
298 in secondary infection, when IgG may rise quickly and dramatically, suppressing the IgM  
299 response and limiting unbound dengue antigen present in serum [33]. In primary  
300 infection, patients would typically present before an IgG response has developed. A  
301 recent systematic review evaluated the potential of dRDT to function as a measure of  
302 seroprevalence but found performance to be suboptimal, with sensitivity ranging from  
303 30-60% [34].

304

305 Our results do highlight the urgent need for better diagnostics and management  
306 algorithms for children with acute febrile illness. Malaria was identified as the cause of  
307 fever in only 22% of participants, and among participants with a negative malaria test,  
308 nearly 80% reported cough or rhinorrhea with more than half (51.1%) reporting both  
309 symptoms. While not confirmed by microbiologic or molecular methods, many of these  
310 children likely had viral infections that would be self-limited and not require antibiotic  
311 treatment [35]. Yet more than 97% of children with a negative malaria test result across  
312 all three sites received a course of antibiotic treatment. Given the growing global threat  
313 of antimicrobial resistance, driven in part by antimicrobial overuse, this patient population  
314 represents an important target for antibiotic stewardship interventions.

315

316 To our knowledge, our study is one of the first to examine the burden of dengue among  
317 children presenting to outpatient clinics in western Uganda with undifferentiated febrile  
318 illness. Strengths of our approach include the diverse geography of the clinical sites,  
319 large sample size, and different diagnostic testing strategies (i.e. dRDT, ELISA, PCR).  
320 The study also has a number of limitations. First, we excluded children with a positive m  
321 RDT from further consideration. While dengue-malaria coinfections have been reported  
322 in other settings [6], this was expected to be a relatively infrequent occurrence. To  
323 explore this possibility, however, we tested 131 mRDT positive children at the Kasese  
324 site, only one (0.77%) of who had a positive IgM band on the dRDT; a prevalence similar  
325 to children with a negative mRDT ( $p=0.53$ ). Second, our facility-based and temporally-  
326 limited enrollment strategy may have missed focal outbreaks of dengue in the  
327 community. Dengue is well-known to emerge rapidly in non-immune populations then  
328 quickly disappear. Studies from neighboring countries and other surveillance methods  
329 do, however, support the validity of our findings. Third, IgG ELISA may overestimate  
330 dengue prevalence as this assay may also detect cross-reactive antibodies elicited by  
331 infection by related flaviviruses, though neutralization testing also supported prior  
332 infection by dengue for some subjects in this population [36, 37]. Lastly, we did not have  
333 the means to screen all specimens for anti-dengue IgM, which precluded a direct  
334 comparison of serologic IgM testing to the dRDT result.

335

### 336 **Conclusions**

337 Dengue does not account for a large proportion of non-malarial, acute febrile illness  
338 presentations in western Uganda. However, the presence of the vector and the  
339 pathogen, along with a large susceptible population make sporadic outbreaks a major  
340 concern. Further investigation into the ecological factors that sustain low-level  
341 transmission in urban centers such as our Mbarara site, are urgently needed.

342 **Abbreviations**

|     |                |                                                 |
|-----|----------------|-------------------------------------------------|
| 343 | ACT            | Artemisinin combination therapies               |
| 344 | AL             | Artemether/lumefantrine                         |
| 345 | C <sub>o</sub> | Degress celsius                                 |
| 346 | CHIKV          | Cikungunya Virus                                |
| 347 | DBS            | Dried Blood Spot                                |
| 348 | DENV           | Dengue Virus                                    |
| 349 | dRDT           | Dengue rapid diagnostic test                    |
| 350 | ELISA          | Enzyme Linked immunosorbent Assay               |
| 351 | ITN            | Insecticide-treated nets                        |
| 352 | mRDT           | Malaria rapid diagnostic test                   |
| 353 | MRRH           | Mbarara Regional Referral Hospital              |
| 354 | NS1            | Non-structural protein 1                        |
| 355 | OD             | Optical Density                                 |
| 356 | RNA            | Ribonucleic acid                                |
| 357 | RT-PCR         | Reverse-Transcriptase Polymerase Chain Reaction |
| 358 | ZIKV           | Zika Virus                                      |

359 **Declarations**

360 *Ethics Approval and Consent to Participate*

361 Ethical approval of the study was provided by the institutional review boards of the  
362 University of North Carolina at Chapel Hill, the Mbarara University of Science and  
363 Technology, and the Uganda National Council for Science and Technology. Written  
364 informed consent for participation in the study was obtained from all adult participants or  
365 from their parent or guardian when participants were children (under 18 years old).

366

367 *Competing Interests*

368 All authors have completed the ICMJE uniform disclosure form and declare: no financial  
369 relationships with any organisations that might have an interest in the submitted work in  
370 the previous three years; no other relationships or activities that could appear to have  
371 influenced the submitted work.

372

373 *Consent for Publication*

374 Not applicable.

375

376 *Funding*

377 The study was supported by Takeda Vaccines. Standard Diagnostics provided the rapid  
378 diagnostic tests for the study at no cost. RMB is supported by the National Institutes of  
379 Health (K23AI141764). JJJ received support from National Institute of Health  
380 (K24AI13499). EJC is supported by the National Institutes of Health (5T32HL007106-43).  
381 Neither Takeda nor Standard Diagnostics nor had any role in the design or conduct of the  
382 study or preparation of the manuscript.

383

384 *Author Contributions*

385 Study conception and design: RMB, MHC, EM. Funding: RMB. Study implementation:  
386 RMB, RM, RK, EC MM, MN, DN, EM. Laboratory testing: RK, DN, SG, DE, YZ, MHC. First  
387 draft of manuscript: RMB, SG, EC, MHC, DN. Revisions: All.

388

#### 389 *Availability of Data and Materials*

390 Deidentified individual data that supports the results will be shared beginning 9 to 36  
391 months following publication provided the investigator who proposes to use the data has  
392 approval from an Institutional Review Board (IRB), Independent Ethics Committee (IEC),  
393 or Research Ethics Board (REB), as applicable, and executes a data use/sharing  
394 agreement with UNC.

395

#### 396 *Acknowledgements*

397 We wish to thank the clinical staff and patients of the Bugoye Health Centre, Kasese  
398 Health Centre, and Mbarara Regional Referral Hospital Outpatient Department for their  
399 participation and support. We also thank Corinna Keeler for the cartography support.



400

## REFERENCES

401

- 402 1. Bhatt S, Gething PW, Brady OJ, Messina JP, Farlow AW, Moyes CL, Drake JM,  
403 Brownstein JS, Hoen AG, Sankoh O *et al*: **The global distribution and burden of**  
404 **dengue**. *Nature* 2013, **496**(7446):504-507.
- 405 2. Simmons CP, Farrar JJ, Nguyen v V, Wills B: **Dengue**. *The New England journal of*  
406 *medicine* 2012, **366**(15):1423-1432.
- 407 3. Brady OJ, Gething PW, Bhatt S, Messina JP, Brownstein JS, Hoen AG, Moyes CL,  
408 Farlow AW, Scott TW, Hay SI: **Refining the global spatial limits of dengue virus**  
409 **transmission by evidence-based consensus**. *PLoS neglected tropical diseases* 2012,  
410 **6**(8):e1760.
- 411 4. WHO: **WHO report on global surveillance of epidemic-prone infectious diseases:**  
412 **dengue and dengue haemorrhagic fever**. In. Geneva: World Health Organization;  
413 2014.
- 414 5. Amarasinghe A, Kuritsk JN, Letson GW, Margolis HS: **Dengue virus infection in Africa**.  
415 *Emerging infectious diseases* 2011, **17**(8):1349-1354.
- 416 6. Chipwaza B, Mugasa JP, Selemani M, Amuri M, Mosha F, Ngatunga SD, Gwakisa PS:  
417 **Dengue and Chikungunya fever among viral diseases in outpatient febrile children**  
418 **in Kilosa district hospital, Tanzania**. *PLoS neglected tropical diseases* 2014,  
419 **8**(11):e3335.
- 420 7. Jaenisch T, Junghanss T, Wills B, Brady OJ, Eckerle I, Farlow A, Hay SI, McCall PJ,  
421 Messina JP, Ofula V *et al*: **Dengue expansion in Africa-not recognized or not**  
422 **happening?** *Emerging infectious diseases* 2014, **20**(10).
- 423 8. Statistics UBo: **National Population and Housing Census 2014**. In. Kampala: Republic  
424 of Uganda; 2014.
- 425 9. Anders KL, Hay SI: **Lessons from malaria control to help meet the rising challenge**  
426 **of dengue**. *The Lancet Infectious diseases* 2012, **12**(12):977-984.
- 427 10. Biswal S, Reynales H, Saez-Llorens X, Lopez P, Borja-Tabora C, Kosalaraksa P,  
428 Sirivichayakul C, Watanaveeradej V, Rivera L, Espinoza F *et al*: **Efficacy of a**  
429 **Tetravalent Dengue Vaccine in Healthy Children and Adolescents**. *The New England*  
430 *journal of medicine* 2019, **381**(21):2009-2019.
- 431 11. Villar L, Dayan GH, Arredondo-Garcia JL, Rivera DM, Cunha R, Deseda C, Reynales H,  
432 Costa MS, Morales-Ramirez JO, Carrasquilla G *et al*: **Efficacy of a tetravalent dengue**  
433 **vaccine in children in Latin America**. *The New England journal of medicine* 2015,  
434 **372**(2):113-123.
- 435 12. Uganda Ministry of Health: **National Guidelines for the Management of Common**  
436 **Conditions**. In. Kampala, Uganda; 2016.
- 437 13. Lim MD: **Dried Blood Spots for Global Health Diagnostics and Surveillance:**  
438 **Opportunities and Challenges**. *The American journal of tropical medicine and hygiene*  
439 2018, **99**(2):256-265.

- 440 14. Andersen NJ, Mondal TK, Preissler MT, Freed BM, Stockinger S, Bell E, Druschel C,  
441 Louis GM, Lawrence DA: **Detection of immunoglobulin isotypes from dried blood**  
442 **spots**. *J Immunol Methods* 2014, **404**:24-32.
- 443 15. Behets F, Kashamuka M, Pappaioanou M, Green TA, Ryder RW, Batter V, George JR,  
444 Hannon WH, Quinn TC: **Stability of human immunodeficiency virus type 1**  
445 **antibodies in whole blood dried on filter paper and stored under various tropical**  
446 **conditions in Kinshasa, Zaire**. *J Clin Microbiol* 1992, **30**(5):1179-1182.
- 447 16. Corbett KS, Katzelnick L, Tissera H, Amerasinghe A, de Silva AD, de Silva AM:  
448 **Preexisting neutralizing antibody responses distinguish clinically inapparent and**  
449 **apparent dengue virus infections in a Sri Lankan pediatric cohort**. *J Infect Dis* 2015,  
450 **211**(4):590-599.
- 451 17. Tissera H, Amarasinghe A, De Silva AD, Kariyawasam P, Corbett KS, Katzelnick L, Tam  
452 C, Letson GW, Margolis HS, de Silva AM: **Burden of dengue infection and disease in**  
453 **a pediatric cohort in urban Sri Lanka**. *The American journal of tropical medicine and*  
454 *hygiene* 2014, **91**(1):132-137.
- 455 18. Willcox AC, Collins MH, Jadi R, Keeler C, Parr JB, Mumba D, Kashamuka M, Tshetu A,  
456 de Silva AM, Meshnick SR: **Seroepidemiology of Dengue, Zika, and Yellow Fever**  
457 **Viruses among Children in the Democratic Republic of the Congo**. *The American*  
458 *journal of tropical medicine and hygiene* 2018, **99**(3):756-763.
- 459 19. de Alwis R, Smith SA, Olivarez NP, Messer WB, Huynh JP, Wahala WM, White LJ,  
460 Diamond MS, Baric RS, Crowe JE, Jr. *et al*: **Identification of human neutralizing**  
461 **antibodies that bind to complex epitopes on dengue virions**. *Proc Natl Acad Sci U S*  
462 *A* 2012, **109**(19):7439-7444.
- 463 20. Henchal EA, Gentry MK, McCown JM, Brandt WE: **Dengue virus-specific and**  
464 **flavivirus group determinants identified with monoclonal antibodies by indirect**  
465 **immunofluorescence**. *The American journal of tropical medicine and hygiene* 1982,  
466 **31**(4):830-836.
- 467 21. Martin DA, Muth DA, Brown T, Johnson AJ, Karabatsos N, Roehrig JT: **Standardization**  
468 **of immunoglobulin M capture enzyme-linked immunosorbent assays for routine**  
469 **diagnosis of arboviral infections**. *J Clin Microbiol* 2000, **38**(5):1823-1826.
- 470 22. Collins MH, McGowan E, Jadi R, Young E, Lopez CA, Baric RS, Lazear HM, de Silva  
471 AM: **Lack of Durable Cross-Neutralizing Antibodies Against Zika Virus from**  
472 **Dengue Virus Infection**. *Emerging infectious diseases* 2017, **23**(5):773-781.
- 473 23. Swanstrom JA, Plante JA, Plante KS, Young EF, McGowan E, Gallichotte EN, Widman  
474 DG, Heise MT, de Silva AM, Baric RS: **Dengue Virus Envelope Dimer Epitope**  
475 **Monoclonal Antibodies Isolated from Dengue Patients Are Protective against Zika**  
476 **Virus**. *mBio* 2016, **7**(4).
- 477 24. Harris PA, Taylor R, Thielke R, Payne J, Gonzalez N, Conde JG: **Research electronic**  
478 **data capture (REDCap)--a metadata-driven methodology and workflow process for**  
479 **providing translational research informatics support**. *J Biomed Inform* 2009,  
480 **42**(2):377-381.
- 481 25. Hosmer D, Lemeshow, S: **Applied Logistic Regression**. New York: Wiley; 2000.

- 482 26. English L, Miller JS, Mbusa R, Matte M, Kenney J, Bwambale S, Ntaro M, Patel P,  
483 Mulogo E, Stone GS: **Monitoring iCCM referral systems: Bugoye Integrated**  
484 **Community Case Management Initiative (BIMI) in Uganda.** *Malaria journal* 2016,  
485 **15**:247.
- 486 27. Lamorde M, Mpimbaza A, Walwema R, Kamyia M, Kapisi J, Kajumbula H, Sserwanga A,  
487 Namuganga JF, Kusemererwa A, Tasimwa H *et al*: **A Cross-Cutting Approach to**  
488 **Surveillance and Laboratory Capacity as a Platform to Improve Health Security in**  
489 **Uganda.** *Health Secur* 2018, **16**(S1):S76-S86.
- 490 28. Clements TL, Rossi CA, Irish AK, Kibuuka H, Eller LA, Robb ML, Kataaha P, Michael NL,  
491 Hensley LE, Schoepp RJ: **Chikungunya and O'nyong-nyong Viruses in Uganda:**  
492 **Implications for Diagnostics.** *Open Forum Infect Dis* 2019, **6**(3):ofz001.
- 493 29. L'Azou M, Assoukpa J, Fanouillere K, Plennevaux E, Bonaparte M, Bouckennooghe A,  
494 Frago C, Noriega F, Zambrano B, Ochiai RL *et al*: **Dengue seroprevalence: data from**  
495 **the clinical development of a tetravalent dengue vaccine in 14 countries (2005-**  
496 **2014).** *Trans R Soc Trop Med Hyg* 2018, **112**(4):158-168.
- 497 30. Reller ME, de Silva AM, Miles JJ, Jadi RS, Broadwater A, Walker K, Woods C, Mayorga  
498 O, Matute A: **Unsuspected Dengue as a Cause of Acute Febrile Illness in Children**  
499 **and Adults in Western Nicaragua.** *PLoS neglected tropical diseases* 2016,  
500 **10**(10):e0005026.
- 501 31. Rojas DP, Barrera-Fuentes GA, Pavia-Ruz N, Salgado-Rodriguez M, Che-Mendoza A,  
502 Manrique-Saide P, Vazquez-Prokopec GM, Halloran ME, Longini IM, Gomez-Dantes H:  
503 **Epidemiology of dengue and other arboviruses in a cohort of school children and**  
504 **their families in Yucatan, Mexico: Baseline and first year follow-up.** *PLoS neglected*  
505 *tropical diseases* 2018, **12**(11):e0006847.
- 506 32. Proesmans S, Katshongo F, Milambu J, Fungula B, Muhindo Mavoko H, Ahuka-Mundeke  
507 S, Inocencio da Luz R, Van Esbroeck M, Arien KK, Cnops L *et al*: **Dengue and**  
508 **chikungunya among outpatients with acute undifferentiated fever in Kinshasa,**  
509 **Democratic Republic of Congo: A cross-sectional study.** *PLoS neglected tropical*  
510 *diseases* 2019, **13**(9):e0007047.
- 511 33. Peeling RW, Artsob H, Pelegrino JL, Buchy P, Cardoso MJ, Devi S, Enria DA, Farrar J,  
512 Gubler DJ, Guzman MG *et al*: **Evaluation of diagnostic tests: dengue.** *Nat Rev*  
513 *Microbiol* 2010, **8**(12 Suppl):S30-38.
- 514 34. Luo R, Fongwen N, Kelly-Cirino C, Harris E, Wilder-Smith A, Peeling RW: **Rapid**  
515 **diagnostic tests for determining dengue serostatus: a systematic review and key**  
516 **informant interviews.** *Clin Microbiol Infect* 2019, **25**(6):659-666.
- 517 35. D'Acremont V, Kilowoko M, Kyungu E, Philipina S, Sangu W, Kahama-Marro J, Lengeler  
518 C, Cherpillod P, Kaiser L, Genton B: **Beyond malaria--causes of fever in outpatient**  
519 **Tanzanian children.** *The New England journal of medicine* 2014, **370**(9):809-817.
- 520 36. Allwin R, Doerr HW, Emmerich P, Schmitz H, Preiser W: **Cross-reactivity in flavivirus**  
521 **serology: new implications of an old finding?** *Med Microbiol Immunol* 2002,  
522 **190**(4):199-202.
- 523 37. Speer SD, Pierson TC: **VIROLOGY. Diagnostics for Zika virus on the horizon.**  
524 *Science* 2016, **353**(6301):750-751.  
525

**Table 1:** Description of clinical sites

| Study Site                         | Location       | District | GPS                  | Elevation | Setting    | Facility Type            | Referral Base | Monthly Clinic Visits | Malaria Prevalence* |
|------------------------------------|----------------|----------|----------------------|-----------|------------|--------------------------|---------------|-----------------------|---------------------|
| Bugoye Health Centre III           | Bugoye Village | Kasese   | 0° 30' N<br>30° 1' E | 1,242m    | Rural      | Public Health Centre III | 50,000        | 800                   | 17.6%               |
| Kasese Health Centre III           | Kasese Town    | Kasese   | 0° 17' N<br>30° 7' E | 980m      | Semi-Urban | Public Health Center III | 400,000       | 1,200                 | 17.6%               |
| Mbarara Regional Referral Hospital | Mbarara Town   | Mbarara  | 0° 36' S<br>30° 4' E | 1,442m    | Urban      | Public Teaching Hospital | 2.5 million   | 1,600                 | 5.7%                |

\*Regional estimates from 2014-15 Uganda Malaria Indicator Survey

**Table 2:** Demographic and clinical characteristics of the study cohort

| Characteristic                                       | All          | Malaria RDT Positive | Malaria RDT Negative | p-Value           |
|------------------------------------------------------|--------------|----------------------|----------------------|-------------------|
| Patients (n, %)                                      | 1,693 (100)  | 369 (21.8)           | 1,324 (78.2)         | -                 |
| Age, (median, IQR)                                   | 5 (2 – 10)   | 7 (4 – 11)           | 4 (2 – 9)            | <b>&lt;0.001*</b> |
| < 5 years                                            | 788 (46.5)   | 122 (33.1)           | 666 (50.3)           |                   |
| 5 – 12 years                                         | 577 (34.1)   | 155 (42.0)           | 422 (31.9)           | <b>&lt;0.001</b>  |
| ≥ 12 years                                           | 328 (19.4)   | 92 (24.9)            | 236 (17.8)           |                   |
| Female sex (n, %)                                    | 904 (53.4)   | 200 (54.2)           | 704 (53.2)           | 0.73              |
| Recruitment Site (n, %)                              |              |                      |                      |                   |
| Bugoye                                               | 632 (37.3)   | 214 (58.0)           | 418 (31.6)           |                   |
| Kasese                                               | 606 (35.8)   | 138 (37.4)           | 468 (35.4)           | <b>&lt;0.001</b>  |
| Mbarara                                              | 455 (26.9)   | 17 (4.6)             | 438 (33.1)           |                   |
| Slept under bednet (n, %)                            | 1,222 (73.0) | 244 (67.2)           | 978 (74.5)           | <b>0.005</b>      |
| Excluding Mbarara                                    | 858 (70.3)   | 235 (67.9)           | 623 (71.3)           | 0.25              |
| Days since fever onset (median, IQR)*                | 3 (2 – 3)    | 3 (2 – 3)            | 3 (2 – 3)            | <b>0.0008*</b>    |
| Reported Symptoms                                    |              |                      |                      |                   |
| Anorexia/Poor Feeding                                | 234 (13.8)   | 56 (15.2)            | 178 (13.4)           | 0.39              |
| Arthralgia                                           | 170 (10.0)   | 64 (17.3)            | 106 (8.0)            | <b>&lt;0.001</b>  |
| Cough                                                | 1,178 (69.1) | 208 (56.1)           | 970 (72.7)           | <b>&lt;0.001</b>  |
| Diarrhea                                             | 234 (13.8)   | 34 (9.2)             | 200 (15.1)           | <b>0.004</b>      |
| Headache                                             | 1,076 (63.6) | 276 (74.8)           | 800 (60.4)           | <b>&lt;0.001</b>  |
| Myalgia                                              | 143 (8.5)    | 59 (16.0)            | 84 (6.3)             | <b>&lt;0.001</b>  |
| Rash                                                 | 92 (5.4%)    | 15 (4.1)             | 77 (5.8)             | 0.19              |
| Rhinorrhea                                           | 897 (53.0)   | 134 (36.3)           | 763 (57.6)           | <b>&lt;0.001</b>  |
| Seizures                                             | 6 (0.4)      | 1 (0.3)              | 5 (0.4)              | 0.76              |
| Vomiting                                             | 248 (14.7)   | 46 (12.5)            | 202 (15.3)           | 0.18              |
| Abnormal Vital Signs (n, %)                          |              |                      |                      |                   |
| Febrile (T ≥38 <sub>o</sub> C)                       | 281 (16.6)   | 75 (20.3)            | 206 (15.6)           | <b>0.03</b>       |
| Hypoxia (SpO <sub>2</sub> <90%)                      | 93 (5.5)     | 12 (3.3)             | 81 (6.2)             | <b>0.03</b>       |
| Previously seen at health center for same condition? | 252 (15.0)   | 30 (8.2)             | 222 (16.8)           | <b>&lt;0.001</b>  |
| Taken antimalarials in the last two weeks?           | 175 (10.4)   | 26 (7.1)             | 149 (11.3)           | <b>0.02</b>       |

**Abbreviations:** RDT = rapid diagnostic test; IQR = interquartile range; C<sub>o</sub> = degrees celsius; SpO<sub>2</sub> = oxygen saturation as measured by pulse oximeter. \*Determined using Wilcoxon Rank Sum

**Table 3:** Regression modeling of variables associated with presence of dengue IgG

| Variable     | Unadjusted |             |         | Adjusted* |             |              |
|--------------|------------|-------------|---------|-----------|-------------|--------------|
|              | OR         | 95% CI      | p-value | aOR       | 95% CI      | p-value      |
| Male sex     | 2.08       | 0.95 - 4.54 | 0.07    | 1.93      | 0.88 – 4.25 | 0.10         |
| Age category |            |             |         |           |             |              |
| < 5 years    |            | REF         |         |           |             |              |
| 5 – 12 years | 1.42       | 0.62 – 3.25 | 0.41    |           |             |              |
| ≥ 12 years   | 1.10       | 0.39 – 3.16 | 0.86    |           |             |              |
| Study site   |            |             |         |           |             |              |
| Kasese       |            | REF         |         |           | REF         |              |
| Bugoye       | 3.88       | 0.80 – 18.8 | 0.09    | 4.08      | 0.84 – 19.8 | 0.08         |
| Mbarara      | 11.5       | 2.66 – 49.6 | 0.001   | 11.2      | 2.59 – 48.5 | <b>0.001</b> |
| Bednet use   | 1.61       | 0.61 – 4.27 | 0.34    |           |             |              |

\* Variables that were significant in univariate models with a pre-specified P-value of <0.25 were included in the subsequent multivariate analysis

## FIGURE LEGENDS

**Figure 1:** Map showing location of study sites and population density of each location.

**Figure 2:** Summary of study participation and test results stratified by study site.

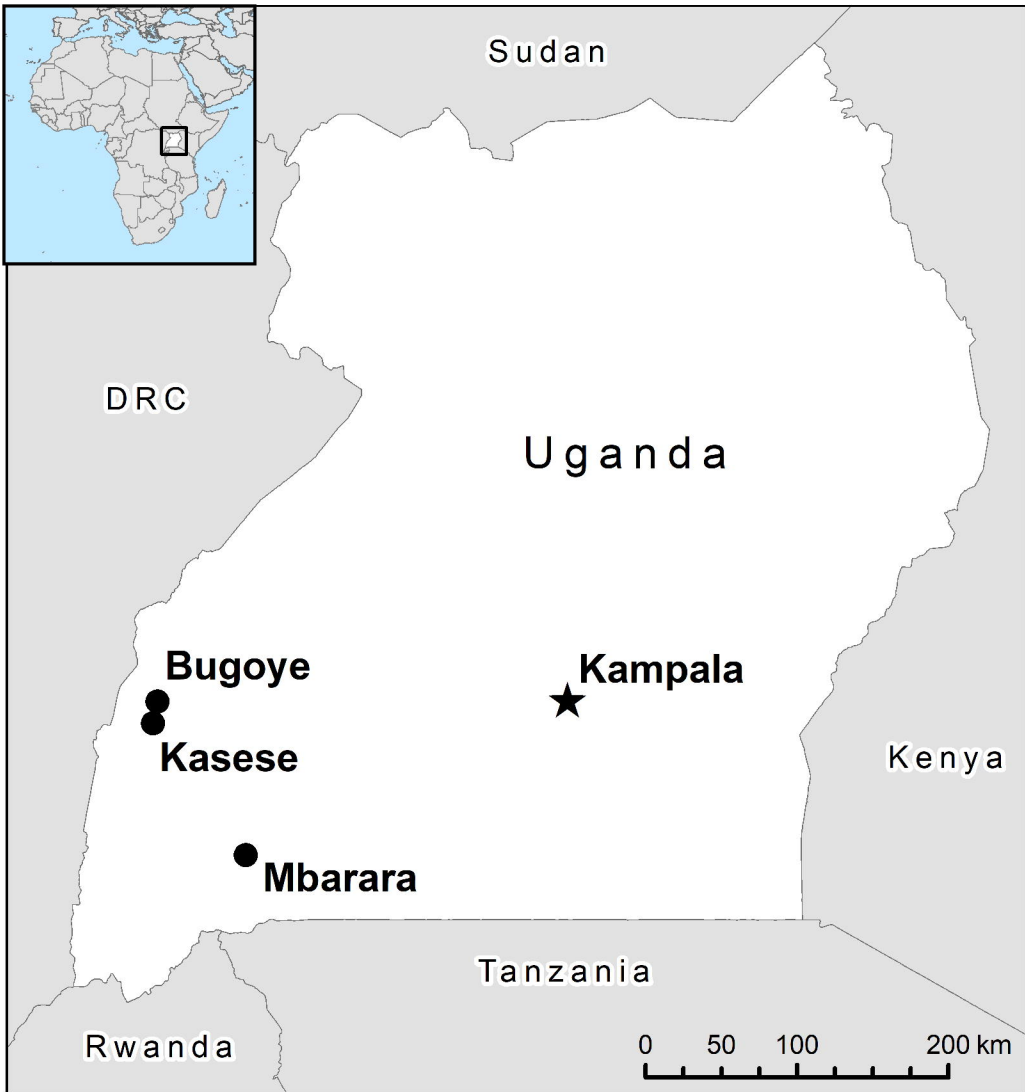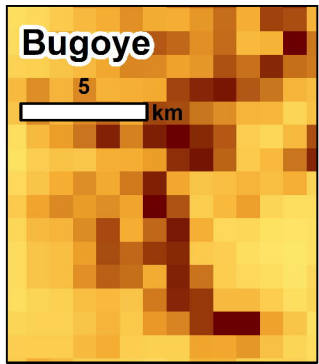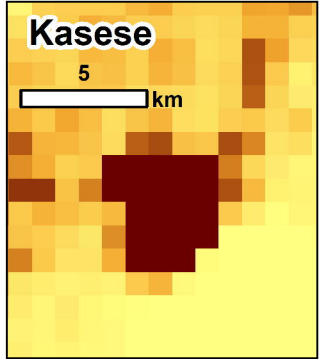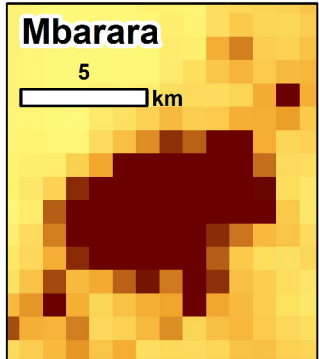



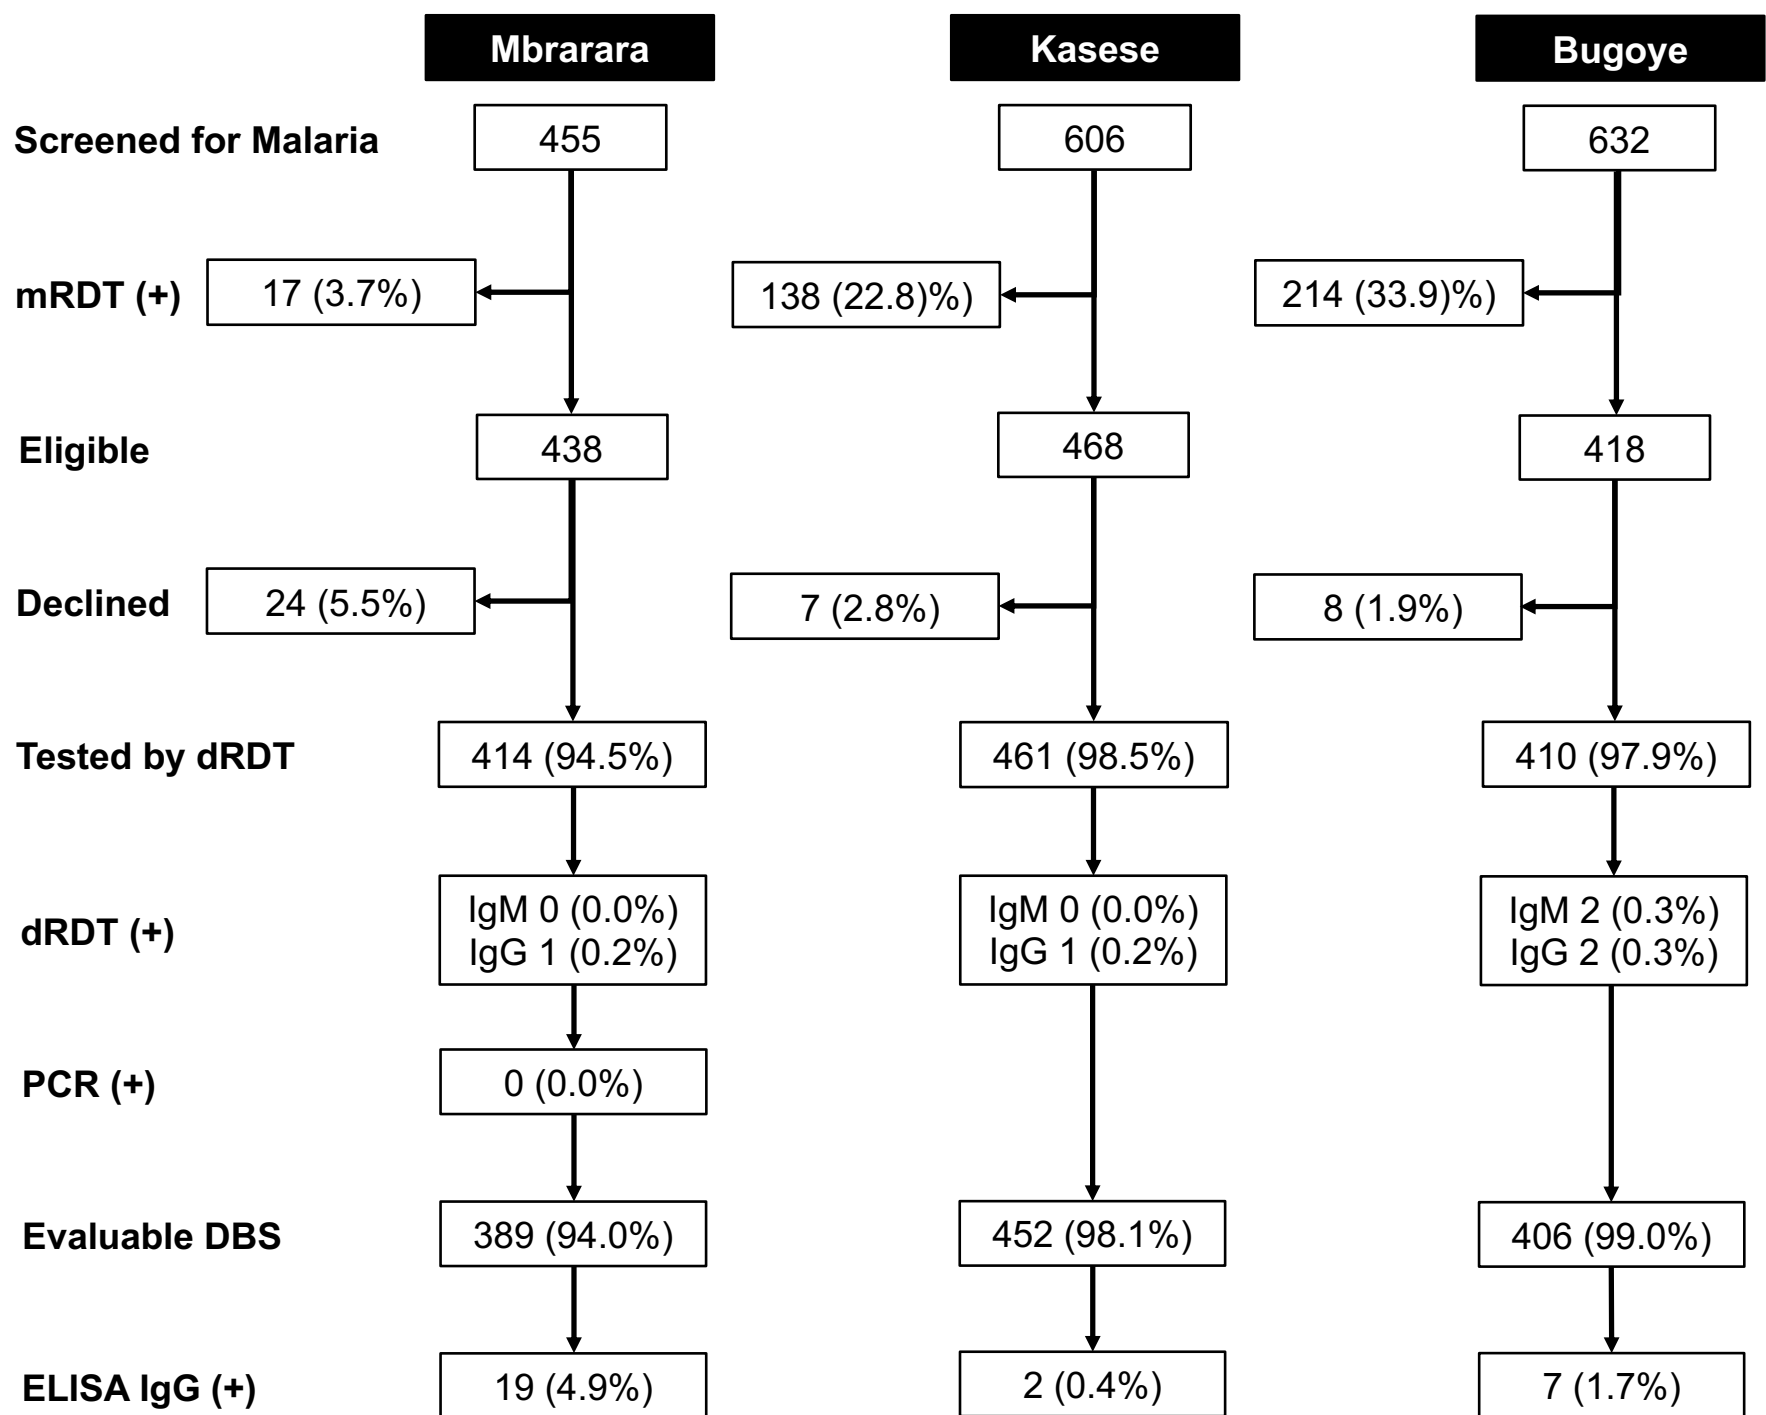

Source: https://medrxiv.org/content/10.1101/2020.08.21.20179002v1.full.pdf
